# Supplementary material for: Factors associated with adverse childhood experiences in Scottish children: a prospective cohort study
Source: PubMed Central journal article supplement (PMC6361326; doi:10.1136/bmjpo-2018-000340), 2019-01-31
Supplement: bmjpo-2018-000340supp001.pdf [file bmjpo-2018-000340supp001.pdf]

|                                                                                                                                                                                                                                                            |                                                                                                                                                                                                                                                                                                                                                                           |        |   |   |   |   |   |   |   |
|------------------------------------------------------------------------------------------------------------------------------------------------------------------------------------------------------------------------------------------------------------|---------------------------------------------------------------------------------------------------------------------------------------------------------------------------------------------------------------------------------------------------------------------------------------------------------------------------------------------------------------------------|--------|---|---|---|---|---|---|---|
| their body in a sexual way? <b>Or</b> Try to or actually have oral, anal, or vaginal sex with you?                                                                                                                                                         |                                                                                                                                                                                                                                                                                                                                                                           |        |   |   |   |   |   |   |   |
| 4. Did you <b>often</b> feel that ...<br><br>No one in your family loved you or thought you were important or special?<br><br><b>Or</b> Your family didn't look out for each other, feel close to each other, or support each other?                       | (child interview)<br>CgPa2: My parents ask about my day in school – NEVER<br>OR<br>CgPa4: My parents play games or do other fun things with me – NEVER<br>OR<br>CgPa6: My parents help me with my homework – NEVER<br>OR<br>CgPa7: My parents tell me when I'm doing a good job with something- NEVER<br>OR<br>CgPa13: My parents check to make sure I'm doing ok - NEVER | Child  |   |   |   |   |   |   | X |
| 5. Did you <b>often</b> feel that ...<br><br>You didn't have enough to eat, had to wear dirty clothes, and had no one to protect you?<br><br><b>Or</b> Your parents were too drunk or high to take care of you or take you to the doctor if you needed it? | <i>NOT AVAILABLE</i>                                                                                                                                                                                                                                                                                                                                                      | N/A    |   |   |   |   |   |   |   |
| 6. Were your parents <b>ever</b> separated or divorced?                                                                                                                                                                                                    | If only one natural parent in the household at any sweep (MxHGnp01)                                                                                                                                                                                                                                                                                                       | Parent | X | X | X | X | X | X | X |
| 7. Was your mother or stepmother:                                                                                                                                                                                                                          | IF respondent is mother/stepmother AND IF: And since ^childname was born, has any partner or ex-                                                                                                                                                                                                                                                                          | Parent |   |   |   |   |   | X |   |

|                                                                                                                                                                                                                                                                                    |                                                                                                                                                                                                                                                                                                                                                                                                                                                                                                                                                                               |               |                |                |                |                |                |                |                |
|------------------------------------------------------------------------------------------------------------------------------------------------------------------------------------------------------------------------------------------------------------------------------------|-------------------------------------------------------------------------------------------------------------------------------------------------------------------------------------------------------------------------------------------------------------------------------------------------------------------------------------------------------------------------------------------------------------------------------------------------------------------------------------------------------------------------------------------------------------------------------|---------------|----------------|----------------|----------------|----------------|----------------|----------------|----------------|
| <p><b>Often</b> pushed, grabbed, slapped, or had something thrown at her?</p> <p><b>Or Sometimes or often</b> kicked, bitten, hit with a fist, or hit with something hard?</p> <p><b>Or Ever</b> repeatedly hit over at least a few minutes or threatened with a gun or knife?</p> | <p>partner ever done any of these things to you?<br/> <i>MfHdv061</i> Pushed you or held you down – YES<br/> OR<br/> <i>MfHdv062</i> Kicked, bitten or hit you – YES<br/> OR<br/> <i>MfHdv064</i> Used a weapon against you, for example an ashtray or a bottle – YES</p> <p>AND</p> <p><i>MfHdv07</i> How many times since ^childname was born have any of these things happened to you? - 3. Four or five times OR 4. Six or more times OR 5. Too many to count</p> <p>OR</p> <p><i>MfHdv034</i> Threatened you with a weapon, for example an ashtray or a bottle - YES</p> |               |                |                |                |                |                |                |                |
| <p>8. Did you live with anyone who was a problem drinker or alcoholic or who used street drugs?</p>                                                                                                                                                                                | <p>Has ^childname experienced any of the things listed on this card since the last interview?<br/> <i>MgOve15</i> Drug taking/alcoholism in the immediate family - YES<br/> Alcohol level &gt;14 units per week (harmful level at time)<br/> Use of drugs (use any street drugs in prev 12 months)</p>                                                                                                                                                                                                                                                                        | <p>Parent</p> | <p>X<br/>X</p> | <p>X<br/>X</p> | <p>X<br/>X</p> | <p>X<br/>X</p> | <p>X<br/>X</p> | <p>X<br/>X</p> | <p>X<br/>X</p> |
| <p>9. Was a household member depressed or mentally ill or did a household member attempt suicide?</p>                                                                                                                                                                              | <p>Has ^childname experienced any of the things listed on this card since the last interview?<br/> <i>MgOve16</i> Mental disorder in the immediate family – YES<br/> OR<br/> DASS* score of &gt;1SD above 0<br/> OR<br/> SF12MCS** score of &lt;=35</p>                                                                                                                                                                                                                                                                                                                       | <p>Parent</p> | <p>X<br/>X</p> | <p>X<br/>X</p> | <p>X<br/>X</p> | <p>X<br/>X</p> | <p>X<br/>X</p> | <p>X<br/>X</p> | <p>X<br/>X</p> |
| <p>10. Did a household member go to prison?</p>                                                                                                                                                                                                                                    | <p>Has ^childname experienced any of the things listed on this card since the last interview?</p>                                                                                                                                                                                                                                                                                                                                                                                                                                                                             | <p>Parent</p> | <p>X</p>       |                |                | <p>X</p>       | <p>X</p>       | <p>X</p>       | <p>X</p>       |

|  |                                                                                       |  |  |  |  |  |  |  |  |
|--|---------------------------------------------------------------------------------------|--|--|--|--|--|--|--|--|
|  | <i>MgOve20</i> Parent in prison -<br>YES<br>OR (where available)<br><i>MxHGaww3/4</i> |  |  |  |  |  |  |  |  |
|--|---------------------------------------------------------------------------------------|--|--|--|--|--|--|--|--|

\*DASS: Depression, Anxiety and Stress Scale

\*\*SF12MCS: Short Form 12 Mental Component Scale

§These are the same 10 ACEs used in the comprehensive Wave 2 of the original ACE Study (Dong et al., 2004).
