# Supplementary material for: Factors associated with adverse childhood experiences in Scottish children: a prospective cohort study
Source: PubMed Central journal article supplement (PMC6361326; doi:10.1136/bmjpo-2018-000340), 2019-01-31
Supplement: bmjpo-2018-000340supp002.pdf [file bmjpo-2018-000340supp002.pdf]

**Supplementary Table 2 Spearman correlations between socio-demographic data**

|                                                     |    |       |        |         |         |         |
|-----------------------------------------------------|----|-------|--------|---------|---------|---------|
|                                                     | 1. | 2.    | 3.     | 4.      | 5.      | 6.      |
| 1. Sex                                              | 1  | 0.03* | 0.01   | -0.01   | -0.01   | <0.01   |
| 2. Age of mother at birth of child                  |    | 1     | 0.50** | -0.42** | -0.36** | 0.04    |
| 3. Household income quintiles                       |    |       | 1      | -0.51** | -0.49** | 0.04*   |
| 4. Respondent education                             |    |       |        | 1       | 0.38**  | -0.06** |
| 5. Scottish Index of Multiple Deprivation Quintiles |    |       |        |         | 1       | -0.18** |
| 6. Urban-rural classification                       |    |       |        |         |         | 1       |

\*correlation is significant at the 0.05 level

\*\* correlation is significant at the 0.01 level

| $r_s$     | <i>Interpretation</i> |
|-----------|-----------------------|
| 0.00-0.19 | Very weak             |
| 0.20-0.39 | Weak                  |
| 0.40-0.59 | Moderate              |
| 0.60-0.79 | Strong                |
| 0.80-1.0  | Very strong           |
